# Supplementary material
Source: publisher figshare collection journal article supplement (https://frontiersin.figshare.com/ndownloader/files/28376214)

**Reading a book to the child**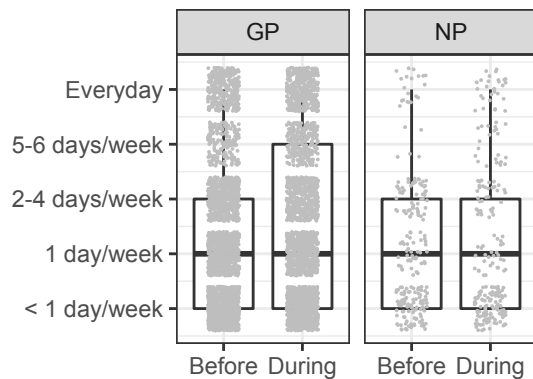**Playing with the child**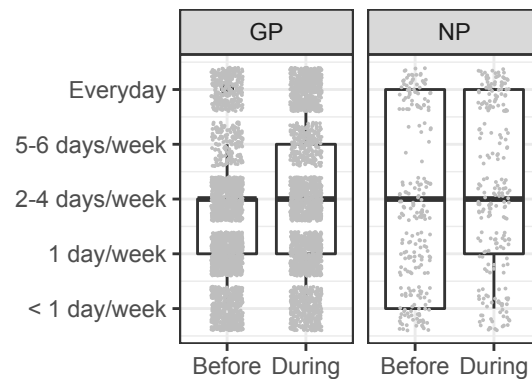**Physical activity**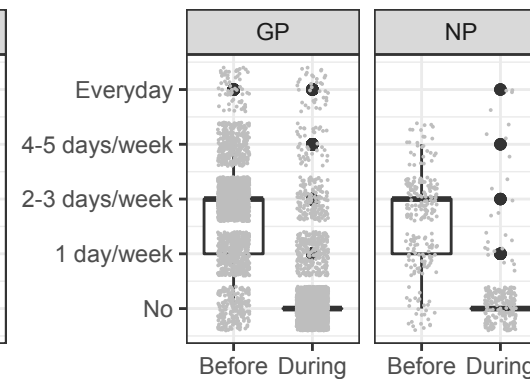**Schooling**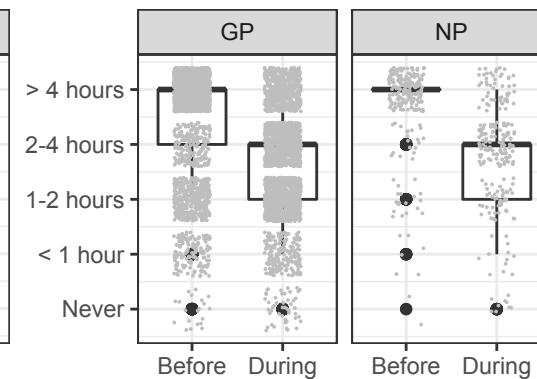**Using social media**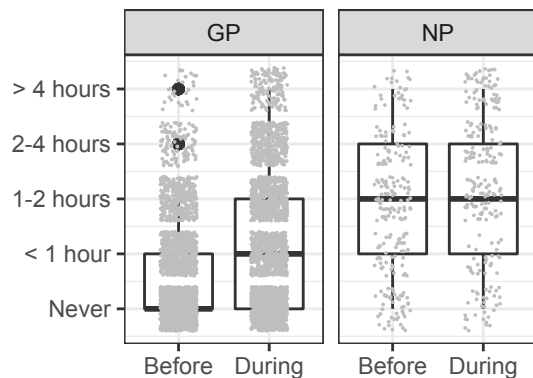**Video chat or phone**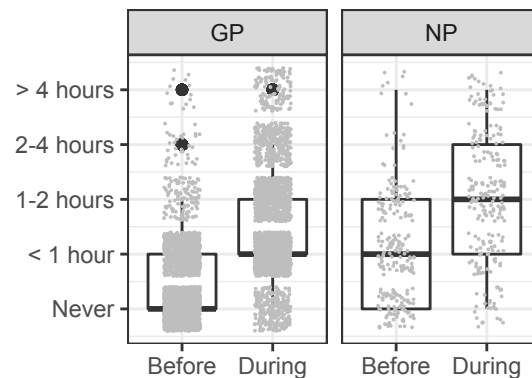**Reading**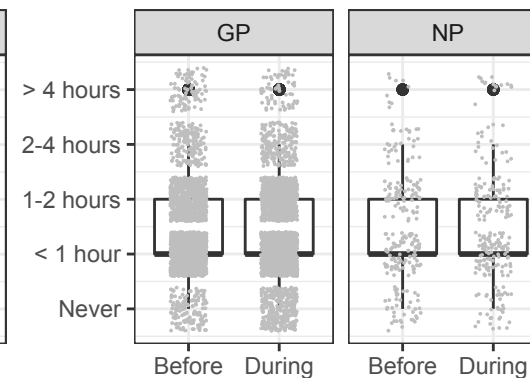**Gaming with electronic devices alone**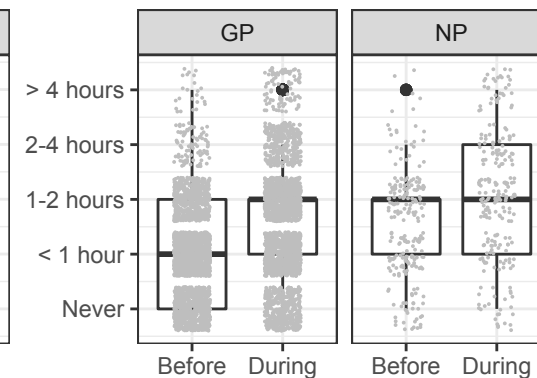**Gaming with electronic devices with other people**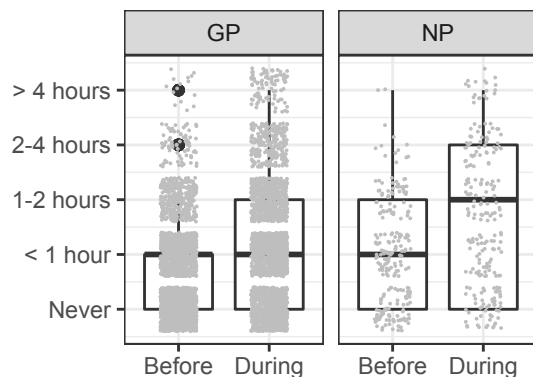**Watching TV**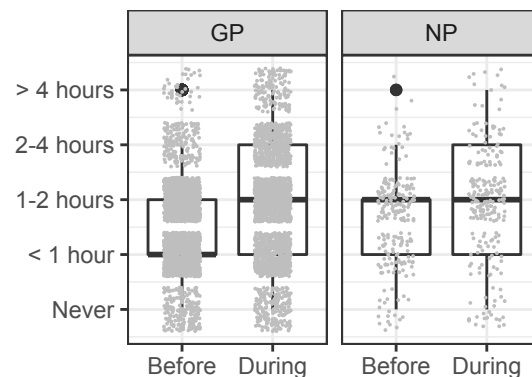**Watching video, movies or TV-series**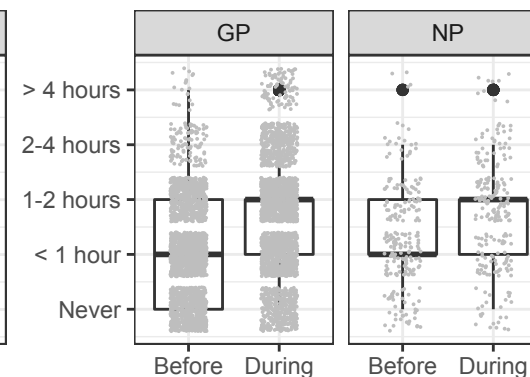**Talking with other people in person**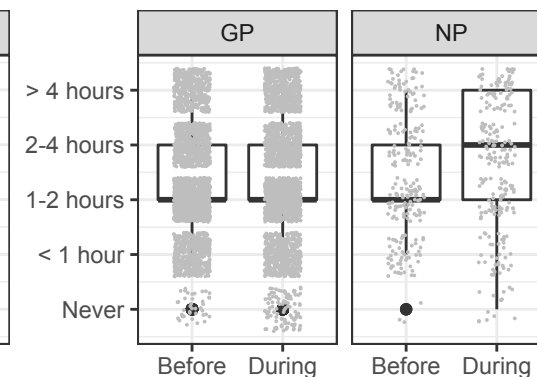

Supplement: Supplementary file [file 28376214]
